# Supplementary material
Source: PubMed Central journal article supplement (PMC2245836)
Supplement: plntphys_pp.107.112995_2.pdf [file plntphys_pp.107.112995_2.pdf]

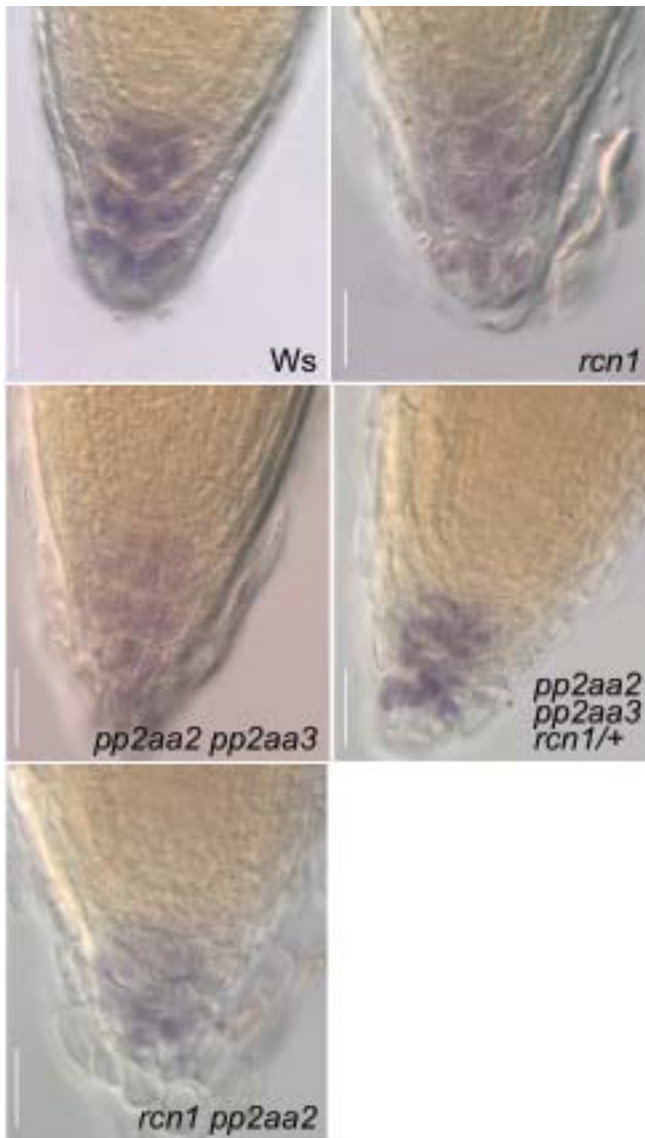

**Figure S2. *RCN1* is haploinsufficient in the *pp2aa2 pp2aa3* background.** Starch staining reveals normal columella organization in wild-type (*Ws*) and *pp2aa2 pp2aa3* double mutant root tips, and abnormal organization in plants with reduced *RCN1* dosage (*rcn1* single mutant, *pp2aa2 pp2aa3 rcn1/+* and *rcn1 pp2aa2*). Scale bars, 25  $\mu$ m.
