# Supplementary material
Source: PubMed Central journal article supplement (PMC2245836)
Supplement: plntphys_pp.107.112995_4.pdf [file plntphys_pp.107.112995_4.pdf]

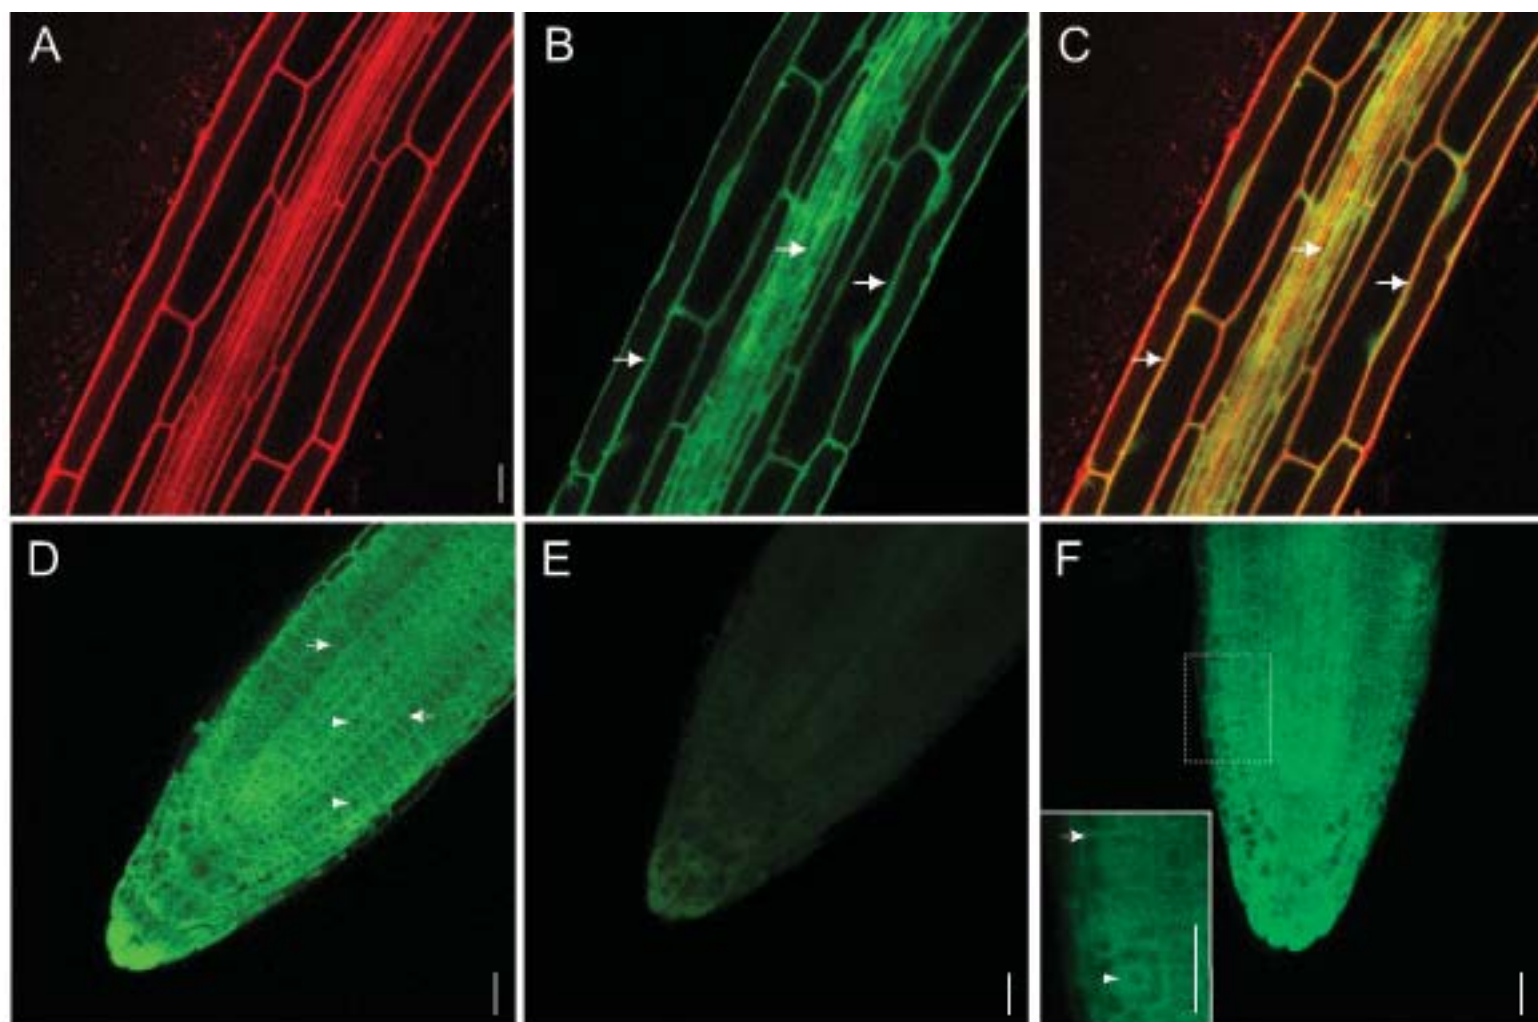

**Figure S4. Accumulation and localization of YFP-RCN1 and YFP-PP2AA3 fusion proteins**  
 YFP-RCN1 is abundant in vascular cells, and shows nuclear and peripheral (arrows) localization. Propidium iodide fluorescence (A) and YFP fluorescence (B) are overlaid (C) in a medial optical section of mature root tissue from line *rcn1 RYR-80*. In roots tips of the *rcn1 RYA-33* (D) and *rcn1 AYA-2* (E, F) lines, YFP-PP2AA3 fusion protein shows similar distribution. Panels D and E were imaged with identical beam and exposure settings as used in Figure 5; panel F presents an *rcn1 AYA-2* root tip imaged at a higher laser beam intensity. Inset panel shows a close-up of the boxed area. The YFP-PP2AA3 fusion shows perinuclear (arrowheads) and peripheral (arrows) localization in both lines. Scale bars, 20  $\mu\text{m}$ .
