# Supplementary material
Source: PubMed Central journal article supplement (PMC2245836)
Supplement: plntphys_pp.107.112995_5.pdf [file plntphys_pp.107.112995_5.pdf]

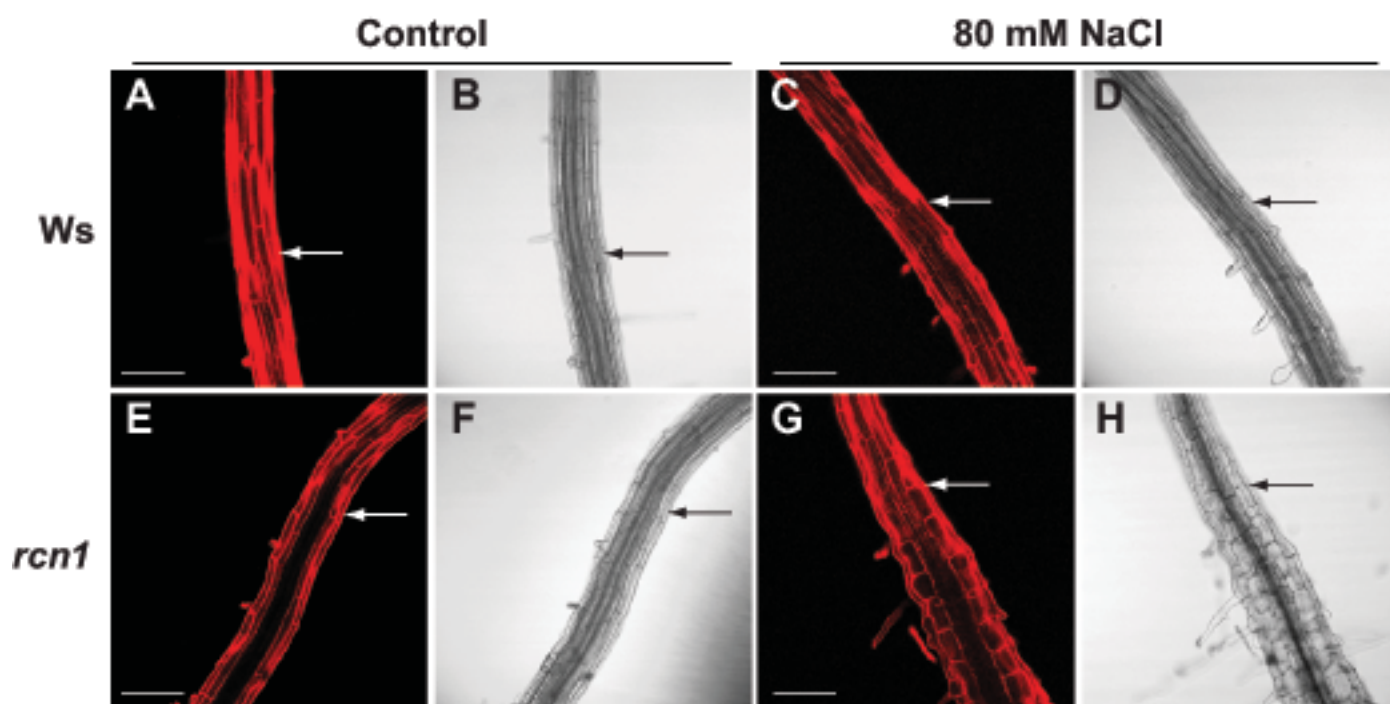

**Figure S5 Expansion of cortical cells in salt-stressed *rcn1* seedlings.** Wild-type (*Ws*) and *rcn1-1* seedlings were transferred to standard growth medium or medium containing 80 mM NaCl at 4 d.p.g. and were harvested and stained with propidium iodide for confocal imaging three days later. The position of the root tip at the time of transfer (white and black arrows) was marked on the Petri dish. Each pair of images shows a longitudinal section of the tissue flanking that site visualized using confocal (A, C, E, G) or DIC (B, D, F, H) microscopy. The most mature cells are at the top of each panel; cells produced after the transfer to new medium are found below the white (or black) arrow in each panel. Scale bars, 150 $\mu$ m.
