# Supplementary material
Source: PubMed Central journal article supplement (PMC2245836)
Supplement: plntphys_pp.107.112995_7.pdf [file plntphys_pp.107.112995_7.pdf]

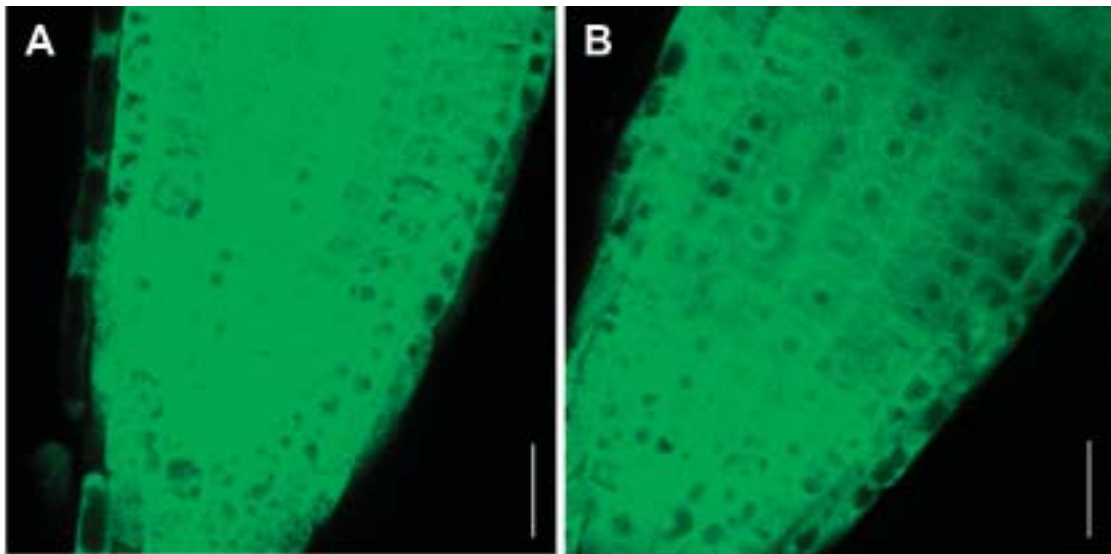

**Figure S7. Localization of a YFP-RCN1 fusion protein following NaCl treatment.** Subcellular localization of YFP-RCN1 in cortical cells of *rcn1 RYR-80* seedling roots was visualized using confocal microscopy after a 20-minute treatment with water (A) or 80 mM NaCl (B). As expected, water-treated control seedlings exhibited cytosolic, perinuclear, and peripheral membrane localization of the fusion protein. Increased nuclear localization of YFP-RCN1 was not detected in NaCl-treated seedlings. Scale bars, 20  $\mu$ m.
